# Supplementary material
Source: PubMed Central journal article supplement (PMC3254058)
Supplement: NIHMS331241-supplement-02.pdf [file NIHMS331241-supplement-02.pdf]

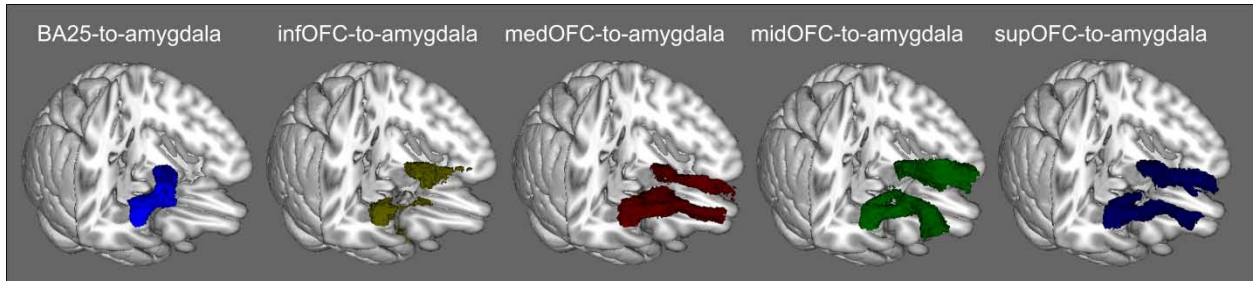

**Fig. S1.** Probabilistic tractography tracts between the prefrontal cortex and amygdala. Subgenual anterior cingulate cortex (BA25); inferior orbitofrontal cortex (infOFC); medial orbitofrontal cortex (medOFC); middle orbitofrontal cortex (midOFC); superior orbitofrontal cortex (supOFC). Demonstrated tracts have been error thresholded.

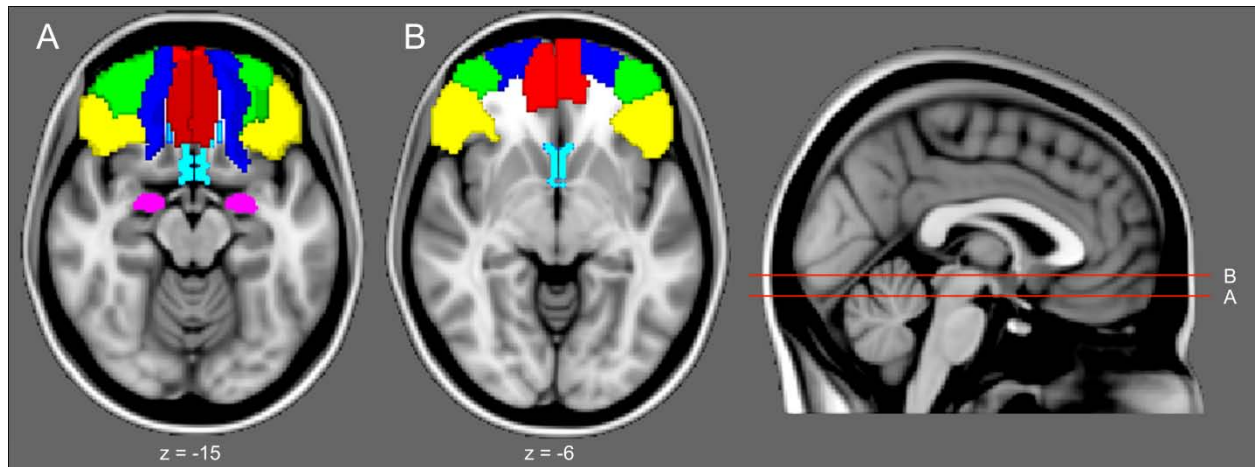

**Fig. S2.** Axial images show anatomical seed masks used for probabilistic fiber tractography: amygdala = pink; subgenual anterior cingulate cortex (BA25) = light blue; inferior orbitofrontal cortex (infOFC) = yellow; medial orbitofrontal cortex (medOFC) = red; middle orbitofrontal cortex (midOFC) = green; superior orbitofrontal cortex (supOFC) = dark blue.

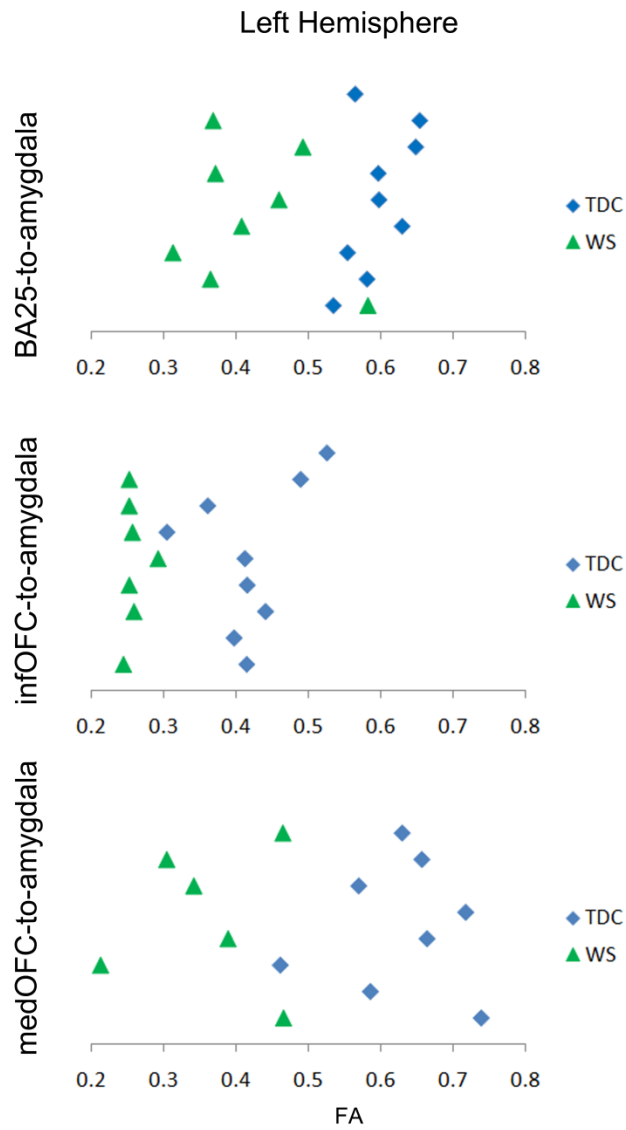

**Fig. S3.** Dotplots show mean individual fractional anisotropy (FA) values within significant clusters in left hemisphere prefrontal-amygdala tracts. Individuals with Williams Syndrome (WS) have lower FA values than typically-developing controls (TDC). Subgenual anterior cingulate (BA25); inferior orbitofrontal cortex (infoFC); medial orbitofrontal cortex (medOFC).

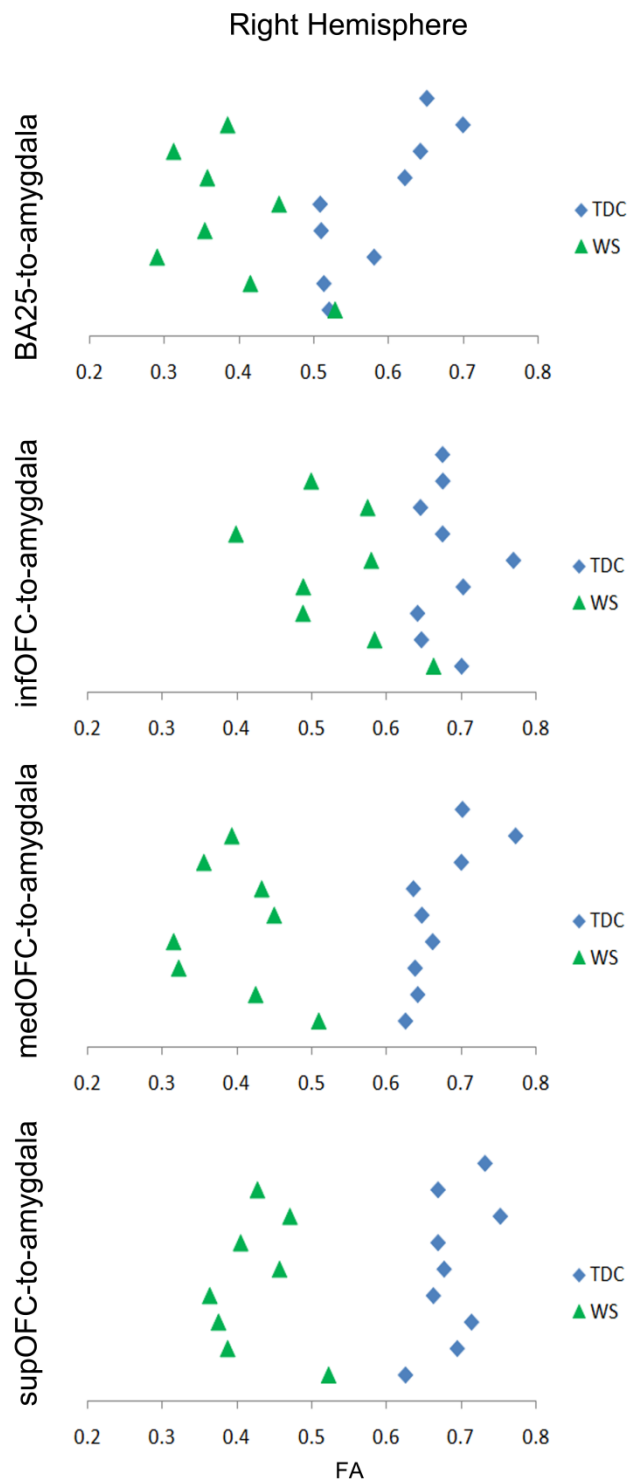

**Fig. S4.** Dotplots show mean individual fractional anisotropy (FA) values within significant clusters in right hemisphere prefrontal-amygdala tracts. Individuals with Williams Syndrome (WS) have lower FA values than typically-developing controls (TDC). Subgenual anterior cingulate (BA25); inferior orbitofrontal cortex (infOFC); medial orbitofrontal cortex (medOFC); superior orbitofrontal cortex (supOFC).

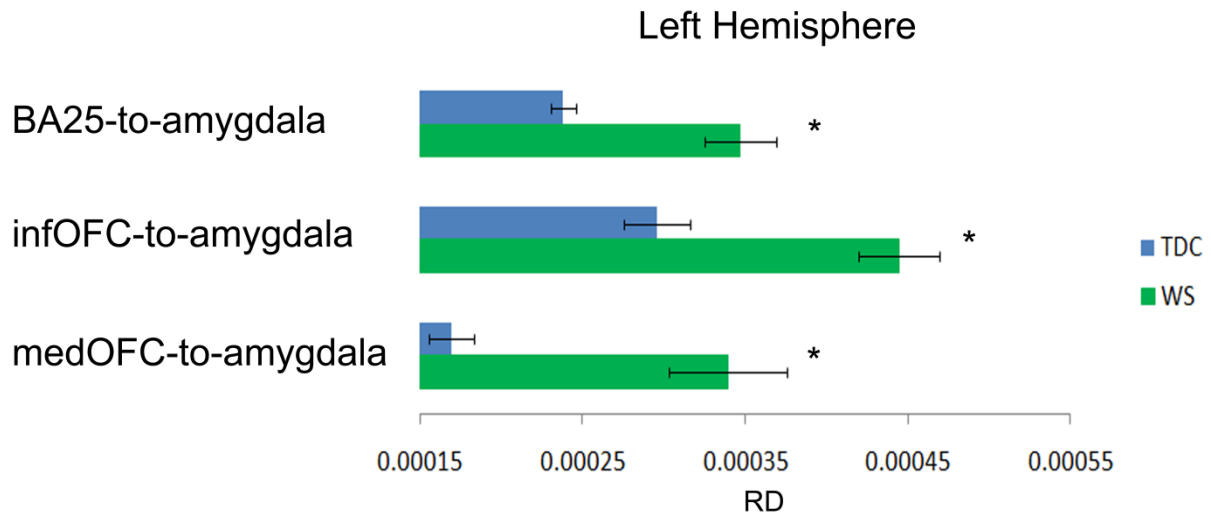

**Fig. S5.** Bar graph represents mean radial diffusivity (RD) values. RD values are extracted from left hemisphere prefrontal-amygdala white matter clusters where individuals with Williams Syndrome (WS) demonstrate significantly lower fractional anisotropy (FA) values than typically-developing controls (TDC). Lower FA values in individuals with WS, compared to TDC, are driven by higher RD in prefrontal-amygdala white matter tracts. Subgenual anterior cingulate (BA25); inferior orbitofrontal cortex (infOFC); medial orbitofrontal cortex (medOFC). Significant results ( $p < .05$ ) are marked with an asterisk (\*).

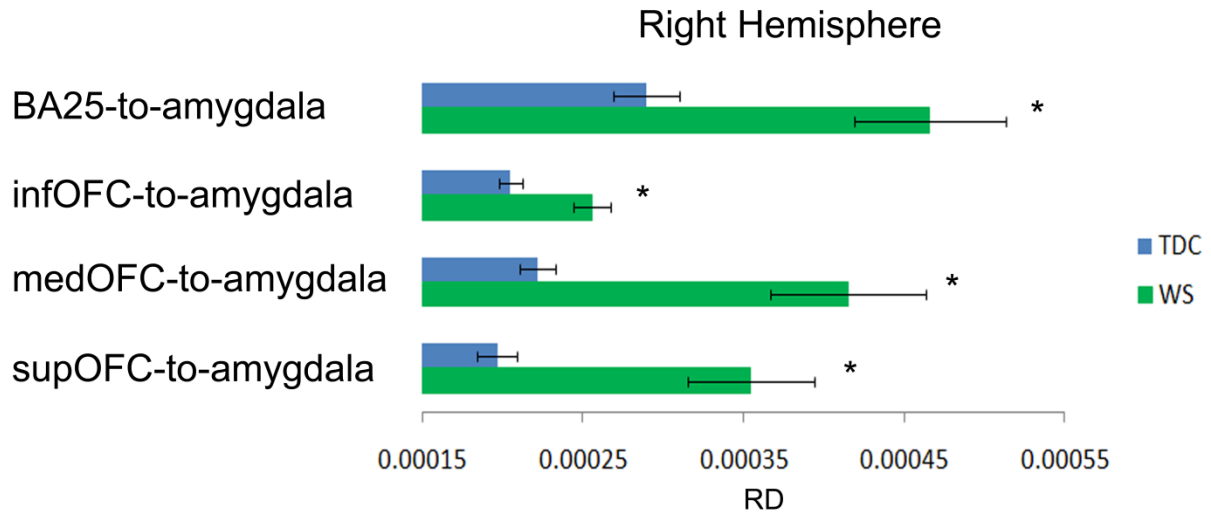

**Fig. S6.** Bar graph represents mean radial diffusivity (RD) values. RD values are extracted from right hemisphere prefrontal-amygdala white matter clusters where individuals with Williams Syndrome (WS) demonstrate significantly lower fractional anisotropy (FA) values than typically-developing controls (TDC). Lower FA values in individuals with WS, compared to TDC, are driven by higher RD in prefrontal-amygdala white matter tracts. Subgenual anterior cingulate (BA25); inferior orbitofrontal cortex (infOFC); medial orbitofrontal cortex (medOFC); superior orbitofrontal cortex (supOFC). Significant results ( $p < .05$ ) are marked with an asterisk (\*).

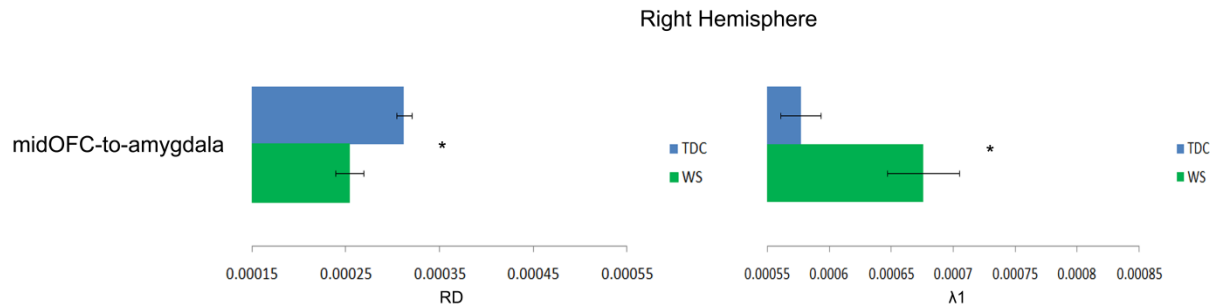

**Fig. S7.** Bar graphs represent mean radial diffusivity (RD) and parallel diffusivity ( $\lambda_1$ ) values. RD and  $\lambda_1$  values are extracted from prefrontal-amygdala white matter clusters where individuals with Williams Syndrome (WS) demonstrate higher fractional anisotropy (FA) values than typically-developing controls (TDC). Higher FA values in individuals with WS, compared to TDC, are driven by significantly lower RD and higher  $\lambda_1$  in prefrontal-amygdala white matter tracts. Middle orbitofrontal cortex (midOFC). Significant results ( $p < .05$ ) are marked with an asterisk (\*).

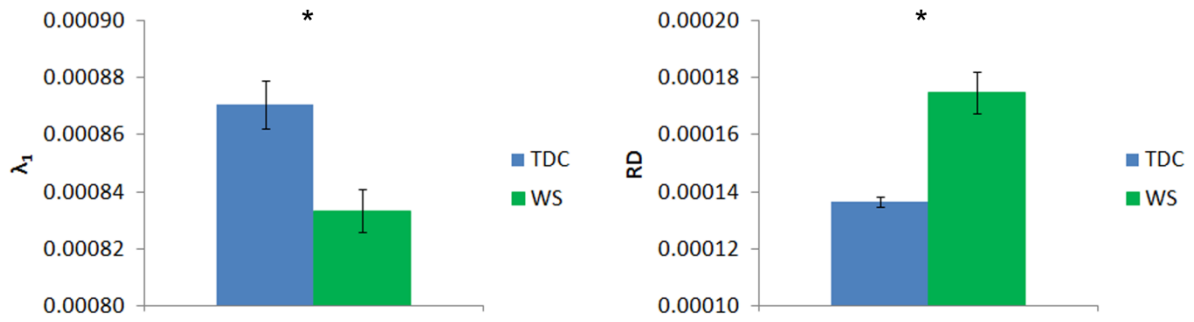

**Fig. S8.** Bar graphs represent mean parallel diffusivity ( $\lambda_1$ ) and radial diffusivity (RD) values.  $\lambda_1$  and RD values are extracted from whole-brain TBSS voxels where individuals with Williams Syndrome (WS) demonstrate significantly lower fractional anisotropy (FA) values than typically-developing controls (TDC). Lower whole-brain FA values in individuals with WS, compared to TDC, are the result of both lower mean  $\lambda_1$  and higher mean RD in individuals with WS. Significant between-group differences ( $p < .05$ ) are marked with an asterisk (\*).



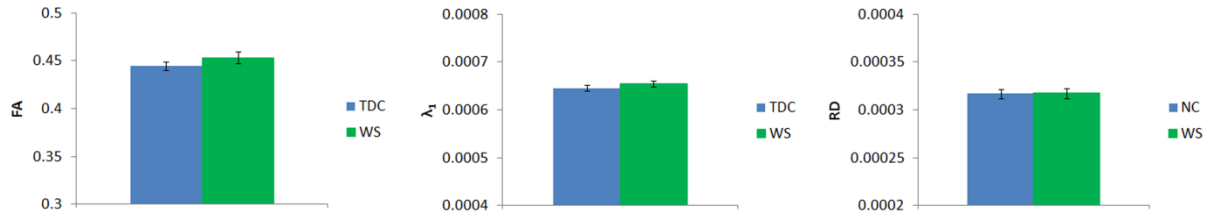

**Fig. S9.** Bar graphs represent mean fractional anisotropy (FA), parallel diffusivity ( $\lambda_1$ ), and radial diffusivity (RD) values across global white matter. When all white matter is considered, rather than the center of each tract, individuals with Williams Syndrome (WS) and typically-developing controls (TDC) show similar diffusion characteristics.
